# Supplementary material for: Neutrophil extracellular traps impair regeneration
Source: PubMed Central journal article supplement (PMC8572775; doi:10.1111/jcmm.16896), 2021-10-08
Supplement: JCMM-25-10008-s001.pdf [file JCMM-25-10008-s001.pdf]

S1

Monocytes in WB of DT treated mice (WD2)

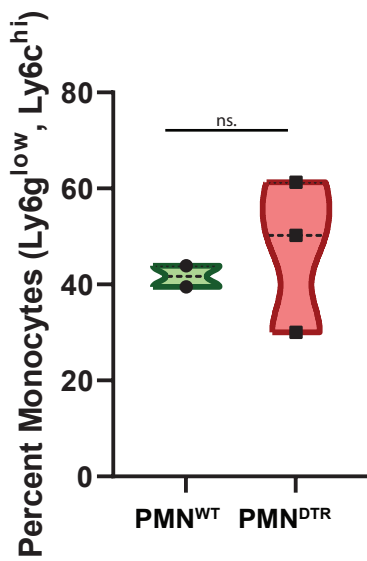

S1. PMN<sup>DTR</sup> mice IP injected with diphtheria toxin (DT, 250ng) on wound days -1 and 1 have normal levels of monocytes within the wound bed. ns. = not significant. N = 2 vs. 3.

S2

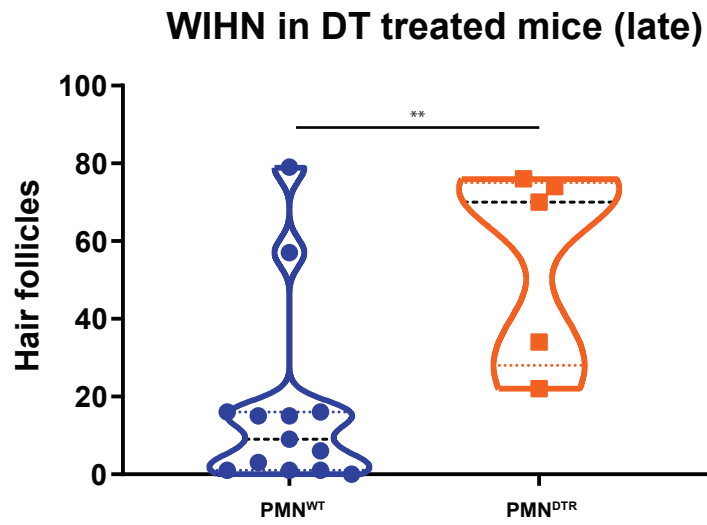

S2. PMN<sup>DTR</sup> mice IP injected with diphtheria toxin (DT, 250ng) on wound days 6, 8, and 10 exhibit increased WIHN (CSLM, images; fold = 3.28, \*\*p = 0.0085, N = 13 vs 5).

A.

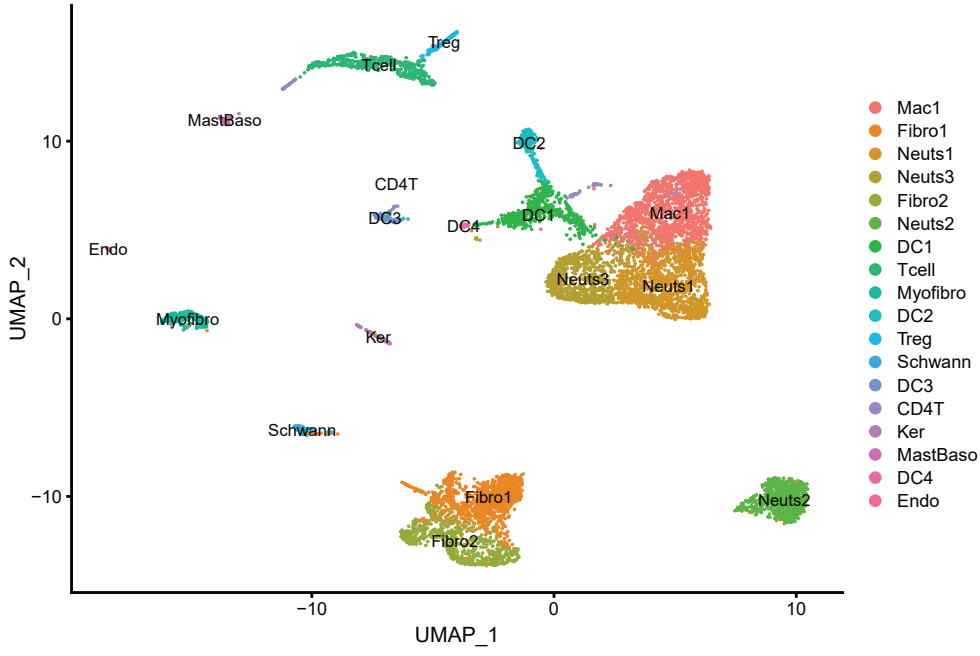

B.

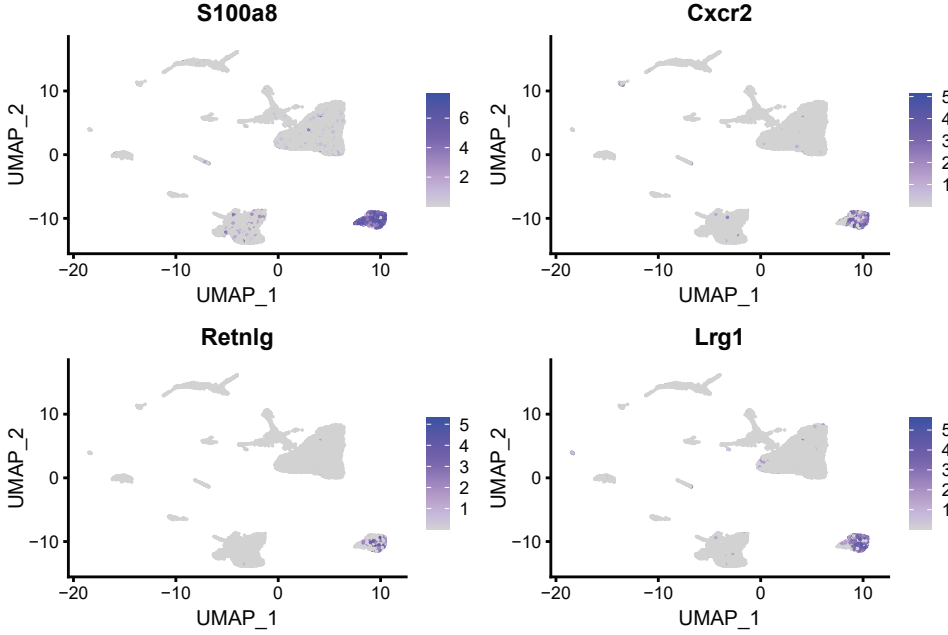

C.

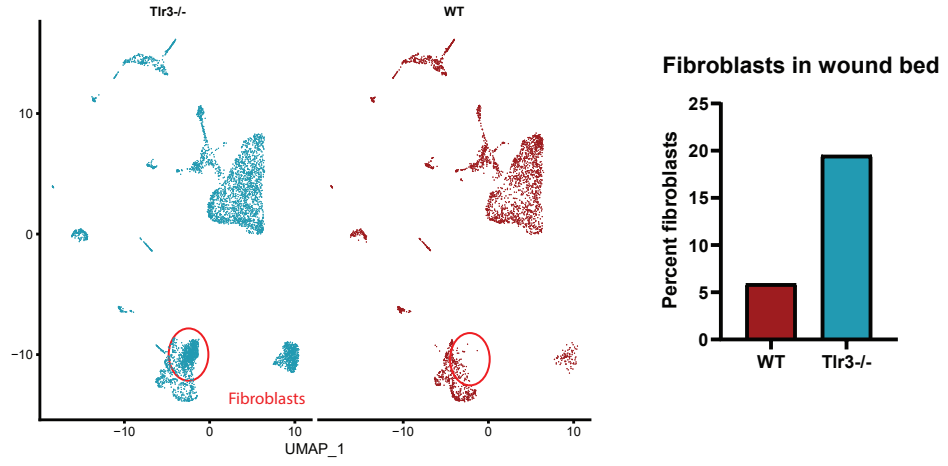

S3: a. Neutrophil associated genes used to identify the neutrophil cluster in UMAP non-linear dimensional reduction, via Seurat R package, of WT and Tlr3<sup>-/-</sup> mice. b. UMAP plot showing cellular heterogeneity with 18 distinct cell clusters identified and color coded.

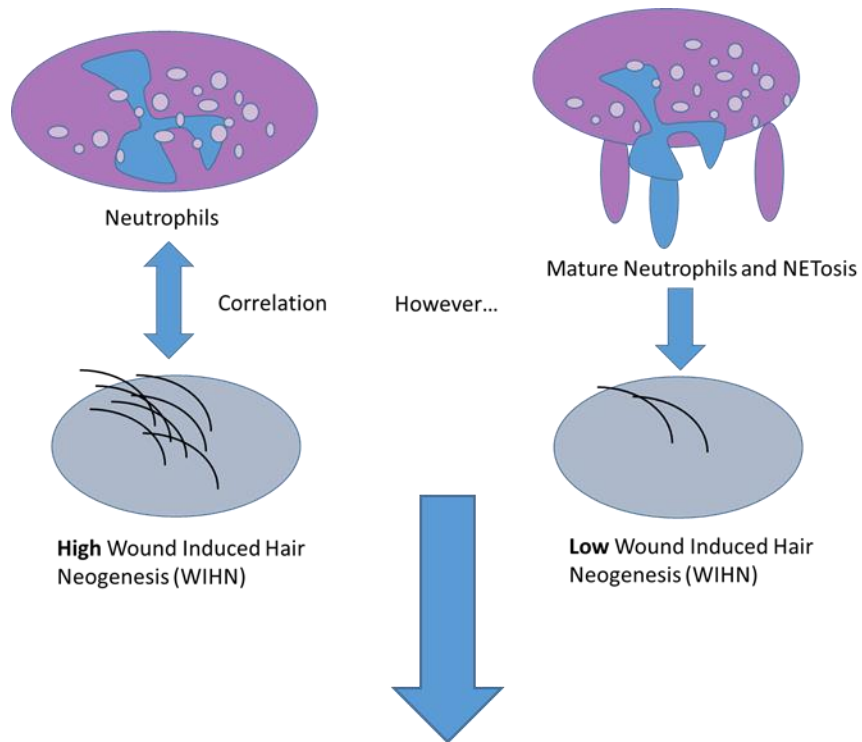

### Candidate Explanations:

- Differences in mature versus immature neutrophils
- Excessive inflammatory activity of neutrophils outweigh dsRNA contribution
- Simple association of Neutrophils with high WIHN without causation
- Others

Supplementary Table 1: Differentially expressed genes in TLR3KO scRNAseq Wounding

Fibro1 diff expressed genes (TLR3KO/wt)

|             | p_val    | avg_logFC    | pct.1 | pct.2 | p_val_adj |
|-------------|----------|--------------|-------|-------|-----------|
| 1 Gm42418   | 3.52E-53 | -0.91236717  | 0.92  | 0.999 | 1.09E-48  |
| 2 Cd74      | 4.89E-17 | -1.062660212 | 0.171 | 0.52  | 1.52E-12  |
| 3 Thbs1     | 3.49E-16 | -0.818274581 | 0.262 | 0.61  | 1.08E-11  |
| 4 Lyz2      | 2.19E-15 | -0.929151347 | 0.182 | 0.502 | 6.80E-11  |
| 5 Lars2     | 9.68E-14 | -0.771531228 | 0.299 | 0.582 | 3.01E-09  |
| 6 Apoe      | 1.50E-13 | -0.760849969 | 0.193 | 0.461 | 4.67E-09  |
| 7 Il1b      | 1.48E-12 | -1.315098057 | 0.059 | 0.306 | 4.58E-08  |
| 8 Ubb       | 2.15E-11 | 0.551482442  | 0.727 | 0.546 | 6.68E-07  |
| 9 Rps29     | 4.51E-11 | -0.337758885 | 0.856 | 0.929 | 1.40E-06  |
| 10 AY036118 | 7.08E-11 | -0.561067335 | 0.337 | 0.619 | 2.20E-06  |
| 11 Hsp90ab1 | 1.13E-10 | 0.412788175  | 0.813 | 0.702 | 3.50E-06  |
| 12 B2m      | 2.05E-10 | -0.733449473 | 0.267 | 0.511 | 6.36E-06  |
| 13 S100a9   | 2.41E-10 | -1.387746037 | 0.011 | 0.204 | 7.50E-06  |
| 14 H2-Ab1   | 4.09E-10 | -0.905331404 | 0.096 | 0.327 | 1.27E-05  |
| 15 H2-Aa    | 4.87E-10 | -0.940155584 | 0.102 | 0.328 | 1.51E-05  |
| 16 H19      | 8.03E-10 | -0.428795005 | 0.465 | 0.737 | 2.49E-05  |
| 17 Postn    | 8.60E-10 | -0.282747842 | 0.85  | 0.977 | 2.67E-05  |
| 18 Ctss     | 1.03E-09 | -0.879803927 | 0.059 | 0.268 | 3.21E-05  |
| 19 H2-Eb1   | 3.01E-09 | -0.928069509 | 0.091 | 0.299 | 9.36E-05  |
| 20 Psap     | 9.31E-09 | -0.608773971 | 0.31  | 0.519 | 0.000289  |

Keratinocytes diff expressed genes (TLR3KO/wt)

|           | p_val    | avg_logFC    | pct.1 | pct.2 | p_val_adj |
|-----------|----------|--------------|-------|-------|-----------|
| 1 Rpl41   | 1.36E-29 | -1.143862273 | 1     | 1     | 4.22E-25  |
| 2 Rps29   | 2.08E-21 | -0.880603537 | 0.977 | 0.946 | 6.46E-17  |
| 3 Rps27   | 9.47E-18 | -0.874483462 | 1     | 0.973 | 2.94E-13  |
| 4 Rps28   | 3.40E-16 | -1.018630657 | 0.909 | 0.973 | 1.06E-11  |
| 5 Rpl39   | 1.42E-11 | -0.770234978 | 0.977 | 1     | 4.41E-07  |
| 6 mt-Nd3  | 3.25E-11 | -1.095754423 | 0.841 | 0.919 | 1.01E-06  |
| 7 Rpl38   | 1.96E-10 | -0.85883353  | 0.932 | 0.973 | 6.07E-06  |
| 8 Uba52   | 3.25E-10 | 0.524452126  | 0.795 | 0.73  | 1.01E-05  |
| 9 Rps21   | 7.92E-09 | -0.729500546 | 0.977 | 0.973 | 0.000246  |
| 10 Rps3a1 | 1.15E-08 | -0.059279833 | 1     | 0.973 | 0.000357  |
| 11 Rpl37a | 7.04E-08 | -0.692523285 | 0.955 | 0.973 | 0.002186  |
| 12 Rpl37  | 1.53E-07 | -0.65346671  | 0.977 | 0.973 | 0.004738  |
| 13 Rplp2  | 8.23E-07 | -0.689704088 | 0.955 | 1     | 0.025555  |
| 14 Pdcd4  | 1.69E-06 | -1.018759626 | 0.477 | 0.865 | 0.052423  |
| 15 Atp1b3 | 2.01E-06 | -1.179291223 | 0.591 | 0.865 | 0.062569  |
| 16 Tpt1   | 2.46E-06 | -0.048868581 | 1     | 1     | 0.076447  |
| 17 Malat1 | 2.80E-06 | -0.929975182 | 1     | 1     | 0.08691   |
| 18 Rpl19  | 5.17E-06 | -0.12558959  | 0.977 | 1     | 0.160544  |
| 19 Metap2 | 7.00E-06 | -0.83289621  | 0.636 | 0.892 | 0.217426  |
| 20 Gja1   | 1.27E-05 | -1.516482496 | 0.523 | 0.865 | 0.39503   |
